# Supplementary material for: Placental Malaria is associated with reduced early life weight development of affected children independent of low birth weight
Source: Springer Nature journal article supplement (doi:10.1186/1475-2875-9-16), 2010-01-14
Supplement: Additional file 2 [file 1475-2875-9-16-s2.doc]

**Additional file 2:**

**Association of placental malaria infection with maternal anaemia and baby’s characteristics at birth**

|  | **Univariable analysis** | | | | **Multivariable analysis** | | |
| --- | --- | --- | --- | --- | --- | --- | --- |
| **2002-05** | | | | **2002-04** | | |
| **Infected** | **Not infected** | OR (95%CI) | p-value | OR (95%CI) | | p-value; adjusted p-value* |
| Crude | Adjusted* |
| **Maternal anaemia**,N=783 | *n=74* | *n=709* |  | 0.866 |  |  |  |
| Normal (Hb≥11.0) | 27 (42.2) | 247 (34.8) | 1 | -- |  |  |  |
| Mild anaemia (10.0≤ Hb <11.0) | 20 (21.3) | 203 (28.6) | 0.9 (0.49; 1.65) | 0.737 |  |  |  |
| Moderate anaemia (7.0≤ Hb<10.0) | 17 (26.6) | 182 (25.7) | 0.85 (0.45; 1.61) | 0.628 |  |  |  |
| Severe anaemia (Hb<7.0) | 0 | 0 | -- | -- |  |  |  |
| Unknown | 10 (13.5) | 77 (10.9) | 1.19 (0.55; 2.56) | 0.661 |  |  |  |
| **Child moratility**, N=783 | *n=74* | *n=709* |  |  |  |  |  |
| Child alive | 71 (96.0) | 694 (97.9) | 1 | -- |  |  |  |
| Child died | 3 (4.1) | 15 (2.1) | 1.95 (0.55; 6.91) | 0.298 |  |  |  |
| **Sex of the baby**, N=783 | *n=74* | *n=709* |  |  |  |  |  |
| Male | 39 (52.7) | 385 (54.3) | 1 | -- |  |  |  |
| Female | 35 (47.3) | 324 (45.7) | 1.07 (0.66; 1.72) | 0.793 |  |  |  |
| **Weight of the baby**,N=783 | *n=74* | *n=709* |  | 0.337 |  |  |  |
| Low birth weight (<2,5kg) | 11 (14.9) | 69 (9.7) | 1.64 (0.82; 3.26) | 0.160 | 1.84 (0.91; 3.72) | 1.46 (0.67; 3.17)* | 0.088; 0.336* |
| Normal birth weight (>= 2,5kg) | 62 (83.7) | 637 (89.8) | 1 | -- | 1 | 1 | -- |
| Unknown | 1 (1.4) | 3 (0.5) | 3.42 (0.35; 33.42) | 0.290 |  |  |  |
| Mean  (95% CI) | 2,972  (2,860; 3,082) | 3,052  (3,019; 3,085) |  | 0.139 |  |  |  |
| **Length of the baby** [cm],N=777 | *n=73* | *n=704* |  |  |  |  |  |
| Mean (95% CI) | 48.2 (47.6; 48.7) | 48.6 (48.4; 48.7) |  | 0.128 |  |  |  |

* Adjusted OR and p values for first or more pregnancies, if baby was born in PM season, year of birth, and duration of schooling of the mother.
